# Supplementary material for: A novel colorimetric and fluorogenic chemosensor for selective detection of Cu2+ ions in mixed aqueous media
Source: Royal Society of Chemistry journal article supplement (doi:10.1039/c4ra07552h), 2014-01-01
Supplement: c4ra07552h1.pdf [file c4ra07552h1.pdf]

## Supplementary Data

### **A novel colorimetric and fluorogenic chemosensor for selective detection of Cu<sup>2+</sup> ions in aqueous media**

**Urmiladevi Narad Yadav<sup>a</sup>, Preeti Pant<sup>a</sup>, Suban Kumar Sahoo<sup>b</sup>, Ganapati Subray  
Shankarling<sup>a,\*</sup>**

*<sup>a</sup>Dyestuff Technology Department, Institute of Chemical Technology, Matunga, Mumbai 400  
019, India*

*<sup>b</sup>Department of Applied Chemistry, SV National Institute of Technology (SVNIT), Surat-  
395007, India.*

\*Corresponding author (Dr. GS Shankarling) E-mail addresses: gsshankarling@gmail.com,  
gs.shankarling@ictmumbai.edu.in Tel.: +91 2233612708; fax: +91 22 33611020.

## FIGURES

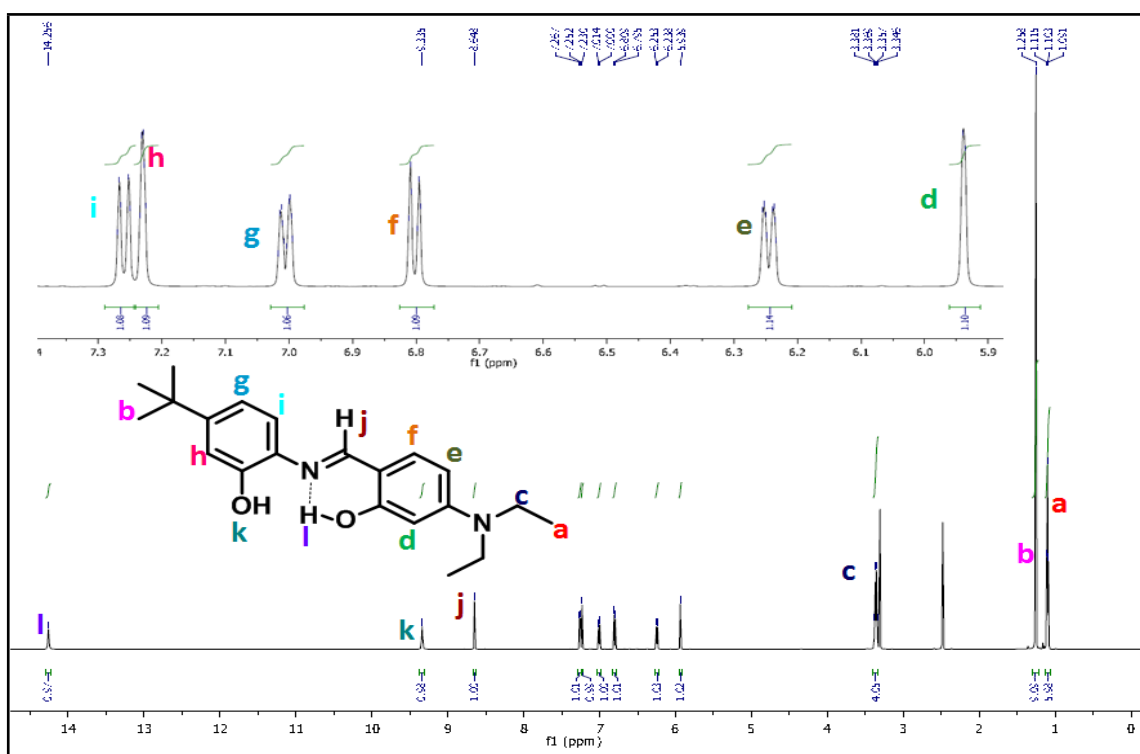

**Fig. S1.**  $^1\text{H-NMR}$  of **L** in  $\text{DMSO-}d_6$ .

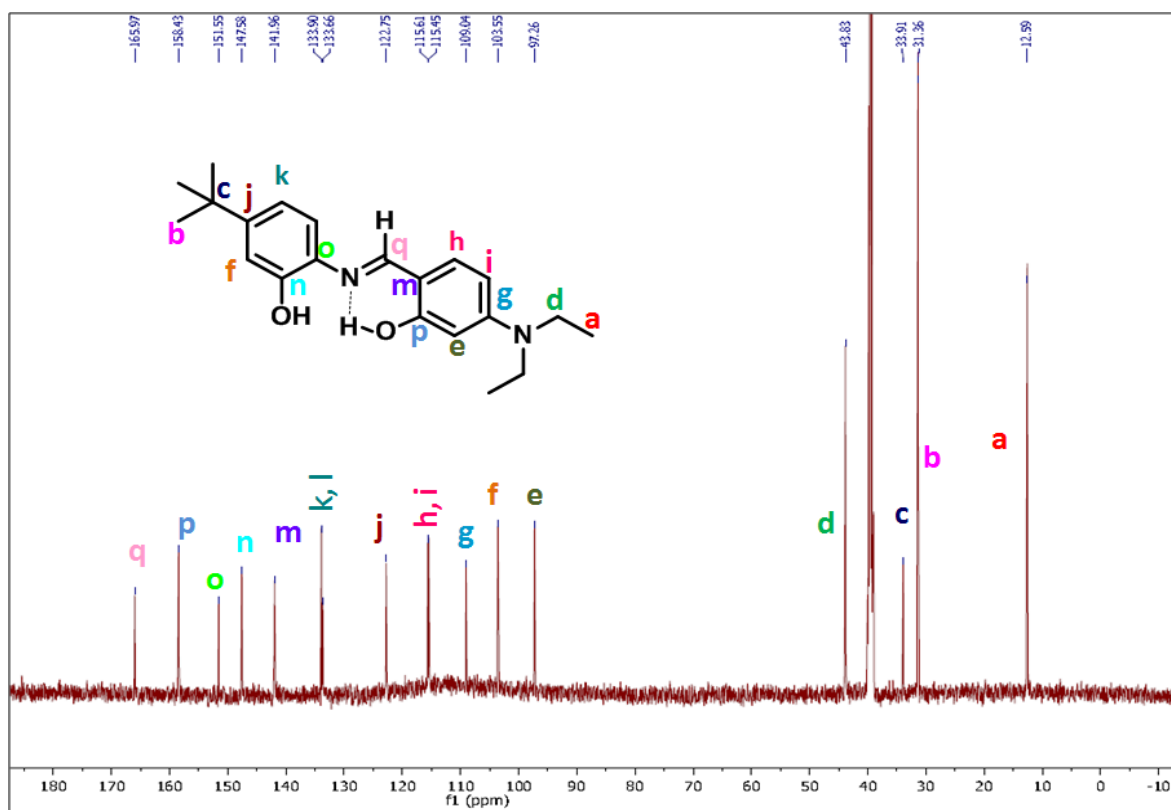

**Fig. S2.**  $^{13}\text{C-NMR}$  of **L** in  $\text{DMSO-}d_6$ .

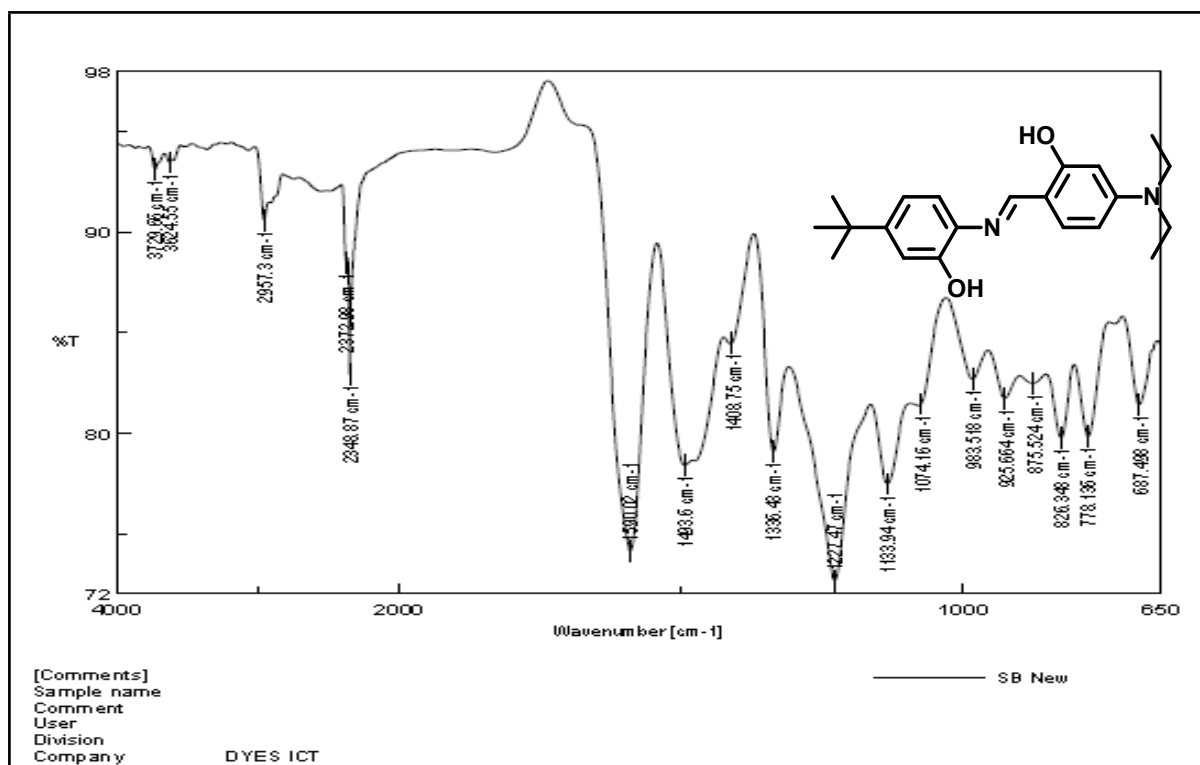

Fig. S3. FT-IR of L.

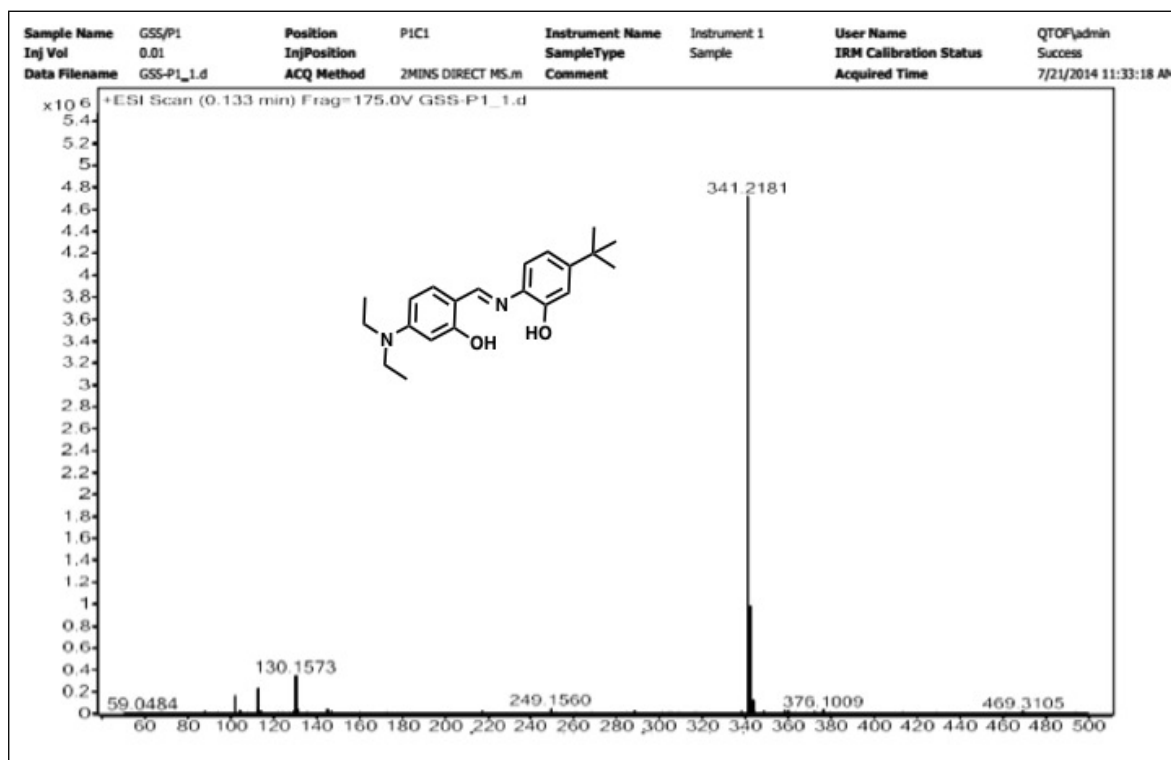

Fig. S4. ESI-Mass of L CH<sub>3</sub>OH as solvent.

SBreptMS\_MS #8 RT: 0.16 AV: 1 NL: 2.05E4  
F: + c ESI Full ms2 475.00@45.00 [ 150.00-550.00]

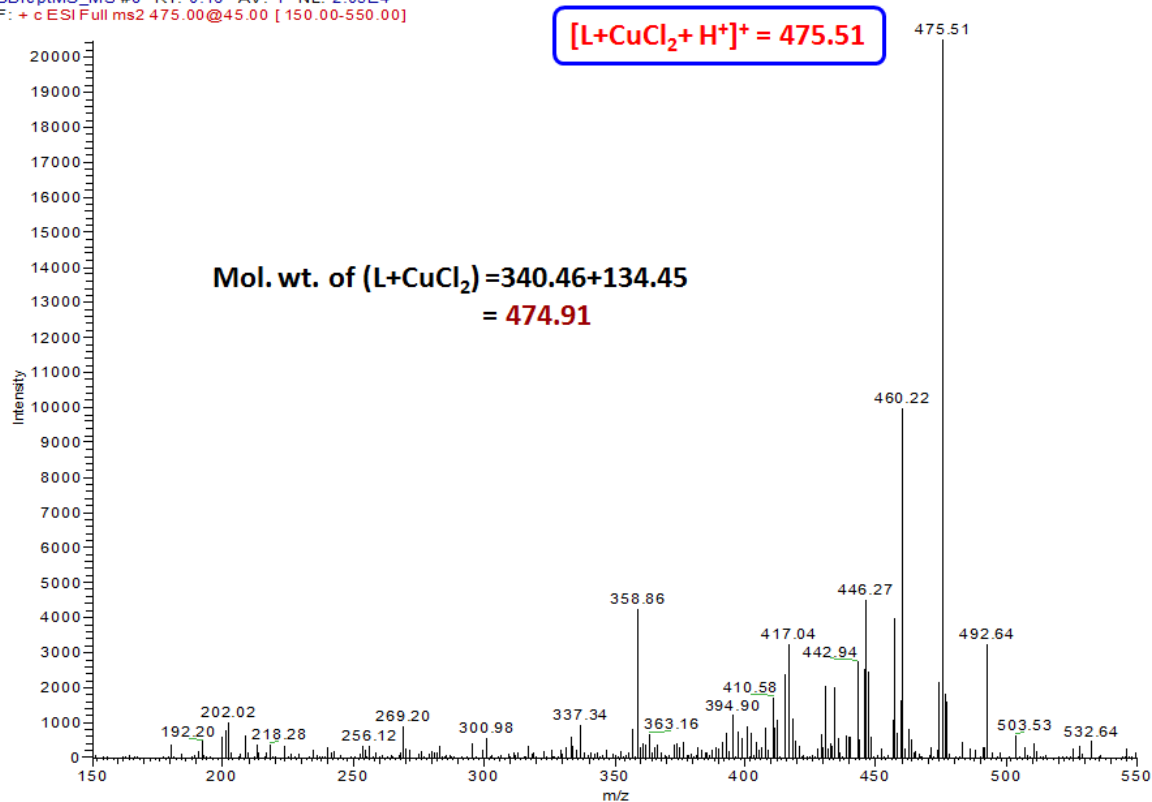

**Fig. S5.** ESI-Mass of L-Cu<sup>2+</sup> complex in CH<sub>3</sub>OH as solvent.

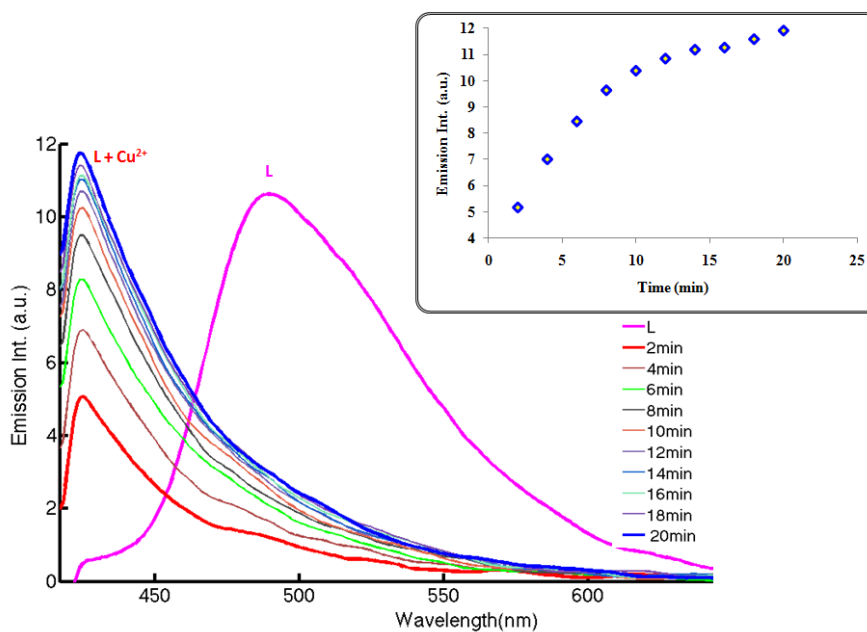

**Fig. S6.** Time course plot representing changes in emission graph of L on interaction with Cu<sup>2+</sup> ions (Insert showing plot of emission intensity of L-Cu<sup>2+</sup> complex with respect to time).

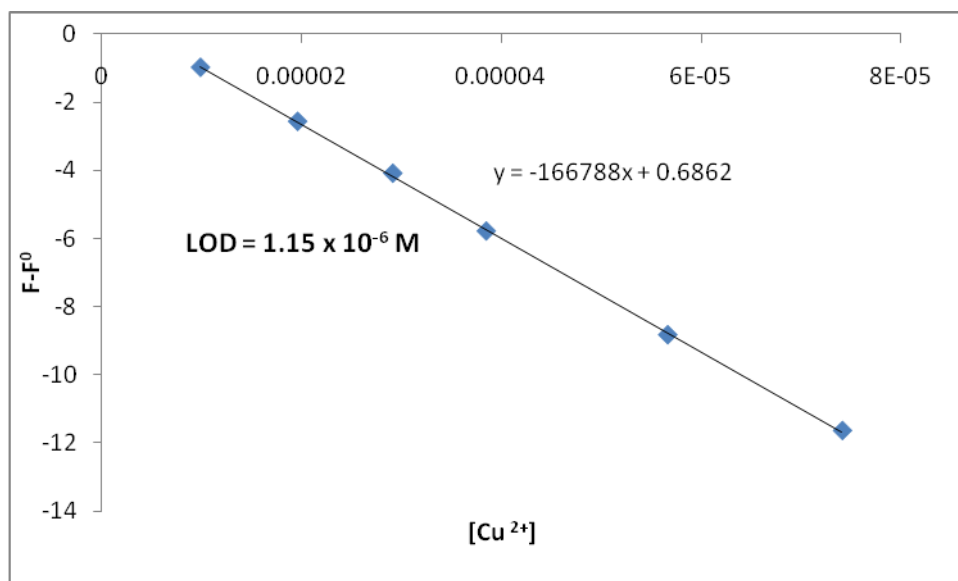

**Fig. S7.** Limit of detection calculation for L-Cu<sup>2+</sup> complex from linear curve fit of emission values.

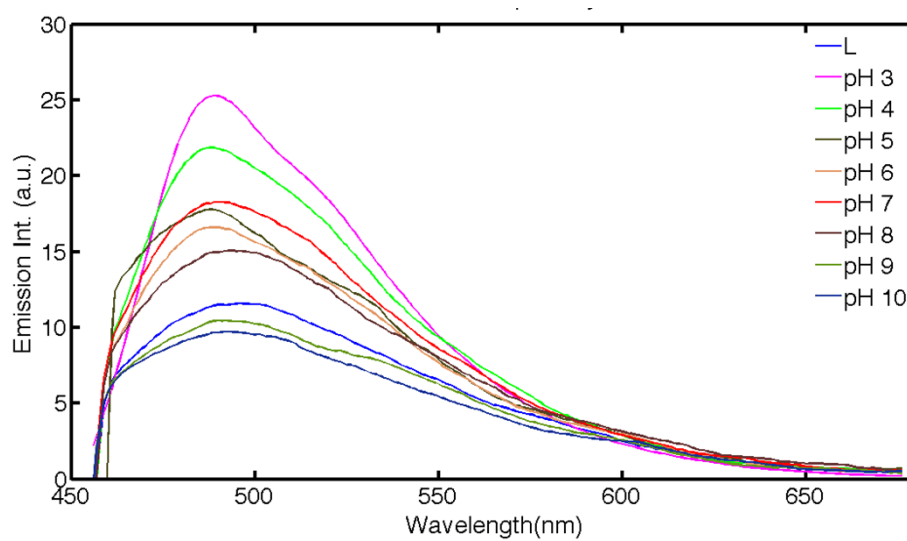

**Fig. S8 (a).** Emission graph of free L (10 μM) in the pH range of 3-10 ( $\lambda_{ex} = 425 \text{ nm}$ ).

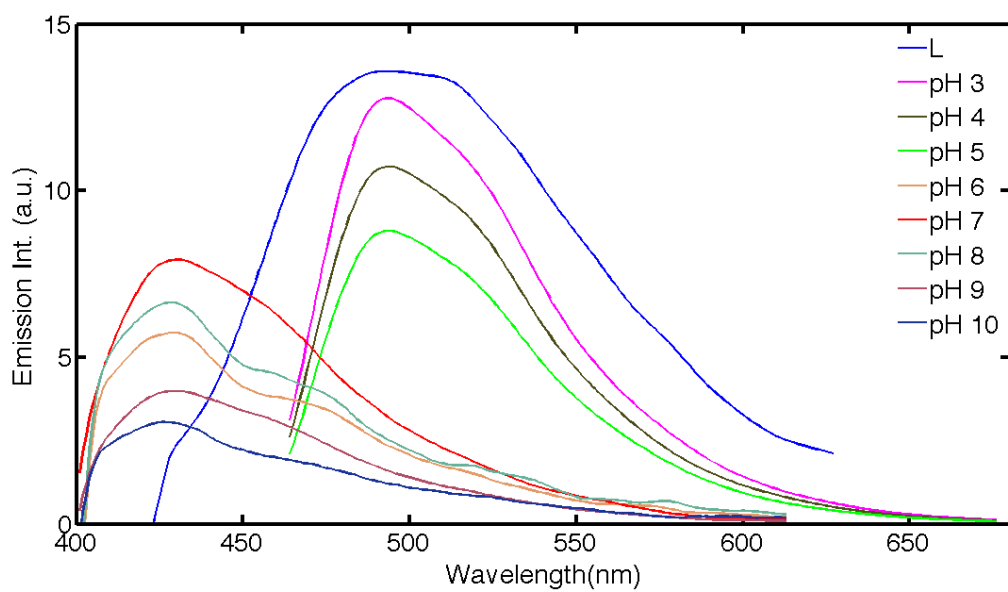

**Fig. S8 (b).** Emission of L-Cu<sup>2+</sup> in the pH range of 3-10.

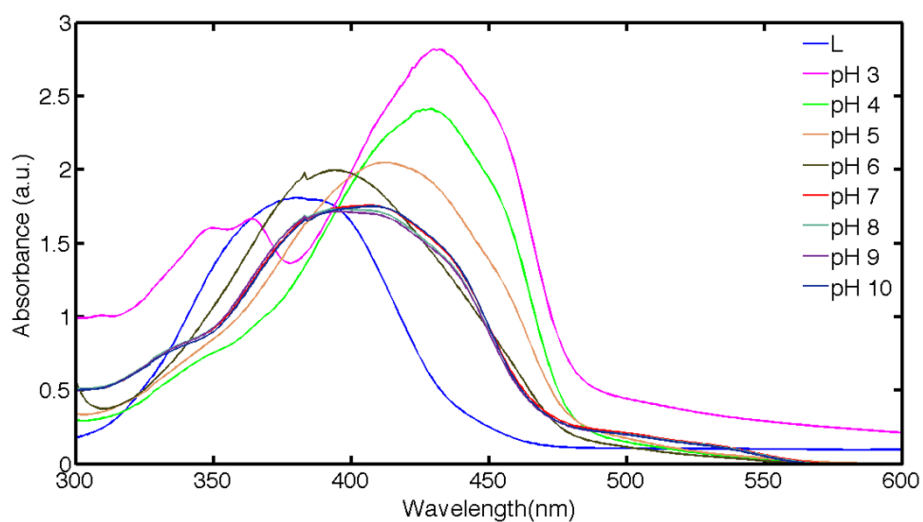

**Fig. S9 (a).** Absorbance of free L (10  $\mu$ M) in the pH range of 3-10.

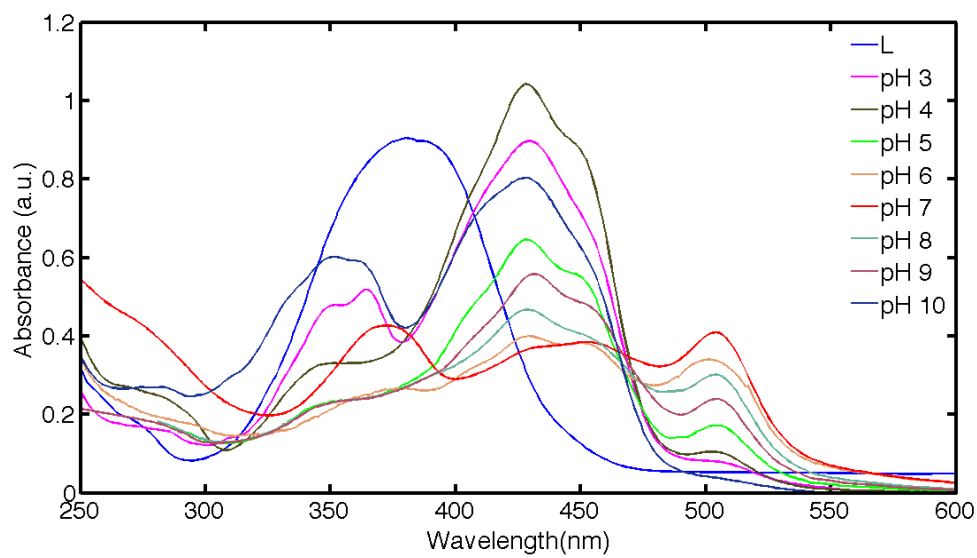

**Fig. S9 (b).** Absorbance of L-Cu<sup>2+</sup> in the pH range of 3-10.
